# Supplementary material
Source: HighWire-hosted journal article supplement (https://cmajopen.ca/highwire/filestream/89697/field_highwire_adjunct_files/3/open-2022-0130-4-at.pdf)
Supplement: open-2022-0130-4-at.pdf [file open-2022-0130-4-at.pdf]

## Study Details

### Study ID

Covidence ID Number

### Title

Title of paper / abstract / report that data are extracted from

### Author(s)

### Organization

### Year Published

### Country in which the study conducted

1. United States
2. UK
3. Canada
4. Australia
5. Other

## Characteristics of included studies

### Methods

#### Aim of study

#### Study design

1. Randomised controlled trial
2. Non-randomised experimental study
3. Cohort study
4. Cross sectional study
5. Case control study
6. Systematic review
7. Qualitative research
8. Prevalence study
9. Case series
10. Case report
11. Diagnostic test accuracy study
12. Clinical prediction rule
13. Economic evaluation
14. Text and opinion
15. Other

## Participants

### Population description

Does the study target one specific population as defined by PROGRESS-Plus?

### Setting

- Primary care
- Specialty care
- Emergency care
- Long-term care

## Guideline Process

Coding guide within NVivo using Shi et al. (<https://pubmed.ncbi.nlm.nih.gov/25479795/>) and Schünemann et al. checklist (<https://www.cmaj.ca/content/186/3/E123>)

### 1. Topic Development

- a. Organization, budget, planning and training
- b. Priority setting
- c. Guideline group membership
- d. Establishing guideline group processes
- e. Identifying target audience and topic selection
- f. Consumer and stakeholder involvement
- g. Conflict of interest considerations
- h. [Scoping questions/question generation](#)
- i. Considering importance of outcomes and interventions, values, preferences, and utilities

### 2. Evidence Review

- a. Deciding what evidence to include and searching for evidence
- b. [Searching relevant evidence](#)
- c. Summarizing evidence and considering additional information
- d. [Appraising evidence and recommendations/](#) Judging quality strength or certainty of a body of evidence

### 3. Guideline Development

- a. [Formulating recommendations/](#)Developing recommendations and determining their strength
- b. Wording of recommendations and of considerations about implementation, feasibility, and equity
- c. Reporting and peer-review
- d. [Providing a flow chart to include equity in CPG](#)
- e. [Reporting of guidelines and comments from stakeholders \(for CPG developers\)](#)
- f. [Assessing the quality of CPGs \(for CPG users\)](#)

4. **Dissemination and implementation**
  - a. [Monitoring implementation](#)
  - b. Evaluation and use
  - c. Updating

5. **Other**

## **Key Findings**

- Key take-aways/lessons learned
- Benefits of the approach as described by authors
- Drawbacks/limitations of the approach as described by authors
- Overall study conclusions

## **Other**

- Strategic goals/actions/plan of equity approach
- Frameworks and tools
- General health equity strategies
